# Supplementary material for: A Culture-Based Strategy Is More Cost Effective Than an Empiric Therapy Strategy in Managing Pediatric Helicobacter pylori Infection
Source: Frontiers journal article supplement (doi:10.3389/fped.2022.860960), 2022-05-03
Supplement: Table_1.pdf [file Table_1.pdf]

**Supplemental Table 1** The direct and indirect costs of diagnosis and treatment for children with *H. pylori* infection according to the two eradication strategies in Taiwan.

| Intervention                                         | Direct cost (US\$†) |
|------------------------------------------------------|---------------------|
| An outpatient visit                                  | 29.5                |
| Venous anesthesia                                    | 142.5               |
| Esophagogastroduodenoscopy                           | 53.5                |
| Rapid urease test                                    | 7.0                 |
| Histology                                            | 62.0                |
| Culture                                              | 7.0                 |
| Antimicrobial susceptibility (MICs)                  | 11.5                |
| C <sup>13</sup> urea breath test                     | 41.5                |
| Drugs (mean)                                         | 24.5                |
| Indirect cost (US\$†)                                |                     |
| Minimum wage for 4 hours in Taiwan                   | 21.5                |
| Minimum two-hour parking fee for an outpatient visit | 1.5                 |

†Currency exchange rate for the New Taiwan dollar (NT\$) to the US\$ as of December

2020: NT\$28.1 = US\$1.
